# Supplementary material
Source: MDPI journal article supplement (https://www.mdpi.com/1424-8247/15/5/637)
Supplement: s1 [file s1]

**- 1st round of PCR**

Amplification using allele specific primers

- MI3F (-20) tailed forward primer for wild type
- MI3F (-40) tailed forward primer for mutant

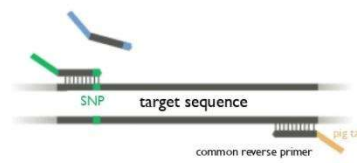

**- 2nd round of PCR**

Amplification using universal fluorescent primers

- HEX universal forward primer for wild type
- FAM universal forward primer for mutant

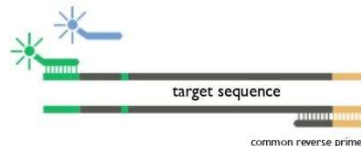

x cycles

**- Fragment analysis**

**SNP identification**  
SNP are identified by size

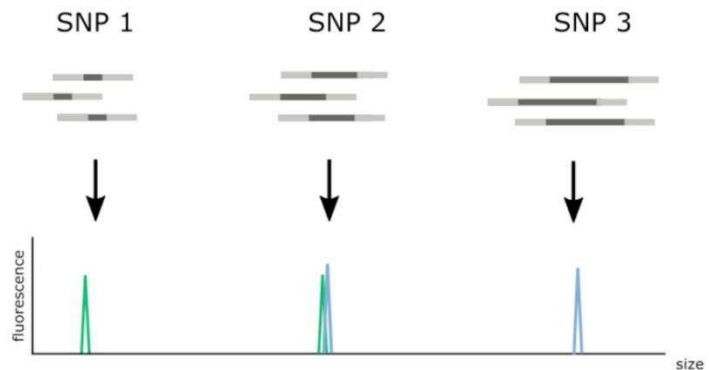

**Genotype identification**  
Genotypes are identified by dye color

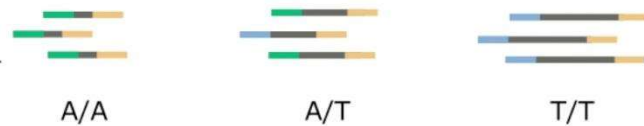

**Figure S1: Principle of the assay**

The first round of amplification used allele specific primers designed to obtain different fragment sizes for each genetic location. The last nucleotide of the 3' flanking forward primers was specific to the genotype (wild-type or a variant allele). The reverse primer was the same for both allele (wild-type or a variant allele). A Pigtail GTTTCTT was added to 5' flanking reverse primers to improve the amplicon migration. A second round of amplification used universal primers combined with fluorescent probes.

A M13 sequence (-20) GTAAAACGACGGCCAGT in the 5' flanking forward wild-type primers allowed hybridization and amplification of the wild type allele and a M13 sequence (-40) GTTTTCCCAGTCACGAC in the 5' flanking forward variant primers allowed hybridization and amplification of the variant allele. After denaturation, PCR products were loaded on a sequencer. The color of the fluorescence of the fragment allowed allelic discrimination and the size of the fragment allowed genetic position discrimination.

**Table S1: Repeatability results. Eight internal control samples were analyzed in duplicate 4 different days.**

**QC1**

[illegible]

**QC2**

[illegible]

|                    |    |    |    |    |    |    |    |    |      |
|--------------------|----|----|----|----|----|----|----|----|------|
| ABCB1-rs2032582-GT | DM | 100% |
| ABCB1-rs2229109    | WT | 100% |
| CYP1A2-1F          | HM | 100% |
| CYP2C9-2           | WT | 100% |
| CYP2C9-3           | WT | 100% |
| CYP2C19-2          | WT | 100% |
| CYP2C19-3          | WT | 100% |
| CYP2C19-17         | DM | 100% |
| CYP2D6-3           | WT | 100% |
| CYP2D6-4           | DM | 100% |
| CYP2D6-6           | HM | 100% |
| CYP2D6-9           | WT | 100% |
| CYP3A4-22          | WT | 100% |
| CYP3A5             | DM | 100% |
| VKORC1-rs9923231   | HM | 100% |

### QC3

|                    | Day1      |           | Day2      |           | Day3      |           | Day4      |           |              |
|--------------------|-----------|-----------|-----------|-----------|-----------|-----------|-----------|-----------|--------------|
| position           | status R1 | status R2 | repetability |
| ABCB1-rs1045642    | DM        | 100%         |
| ABCB1-rs1128503    | DM        | 100%         |
| ABCB1-rs2032582-A  | -         | -         | -         | -         | -         | -         | -         | -         | 100%         |
| ABCB1-rs2032582-GT | DM        | 100%         |
| ABCB1-rs2229109    | WT        | 100%         |
| CYP1A2-1F          | DM        | 100%         |
| CYP2C9-2           | DM        | 100%         |
| CYP2C9-3           | WT        | 100%         |
| CYP2C19-2          | WT        | 100%         |
| CYP2C19-3          | WT        | 100%         |
| CYP2C19-17         | WT        | 100%         |
| CYP2D6-3           | WT        | 100%         |
| CYP2D6-4           | WT        | 100%         |
| CYP2D6-6           | WT        | 100%         |
| CYP2D6-9           | WT        | 100%         |
| CYP3A4-22          | HM        | 100%         |
| CYP3A5             | DM        | 100%         |
| VKORC1-rs9923231   | HM        | 100%         |

### QC4



**QC6**

[illegible]

**QC7**

[illegible]

|                      |    |    |    |    |    |    |    |    |      |
|----------------------|----|----|----|----|----|----|----|----|------|
| CYP3A4-22            | WT | 100% |
| CYP3A5               | HM | 100% |
| VKORC1-<br>rs9923231 | HM | 100% |

#### QC8

|                      | Day1      |           | Day2      |           | Day3      |           | Day4      |           |              |
|----------------------|-----------|-----------|-----------|-----------|-----------|-----------|-----------|-----------|--------------|
| position             | status R1 | status R2 | repetability |
| ABCB1-rs1045642      | WT        | 100%         |
| ABCB1-rs1128503      | WT        | 100%         |
| ABCB1-rs2032582-A    | -         | -         | -         | -         | -         | -         | -         | -         | 100%         |
| ABCB1-rs2032582-GT   | WT        | 100%         |
| ABCB1-rs2229109      | HM        | 100%         |
| CYP1A2-1F            | HM        | 100%         |
| CYP2C9-2             | WT        | 100%         |
| CYP2C9-3             | WT        | 100%         |
| CYP2C19-2            | WT        | 100%         |
| CYP2C19-3            | HM        | 100%         |
| CYP2C19-17           | HM        | 100%         |
| CYP2D6-3             | WT        | 100%         |
| CYP2D6-4             | WT        | 100%         |
| CYP2D6-6             | WT        | 100%         |
| CYP2D6-9             | WT        | 100%         |
| CYP3A4-22            | HM        | 100%         |
| CYP3A5               | DM        | 100%         |
| VKORC1-<br>rs9923231 | DM        | 100%         |

WT: wild-type allele; varHz: heterozygous for the variant allele; varHm: homozygous for the variant allele

QC: internal quality control DNA

R: replicate

**Table S2: Genotyping results of clinical cases and genes involved in the pharmacokinetics of treatments**

|             | ABCB1-<br>rs1045642 | ABCB1-<br>rs1128503 | ABCB1-<br>rs2032582-A | ABCB1-<br>rs2032582-GT | ABCB1-<br>rs2229109 | CYP1A2*1F    | CYP2C9*2 | CYP2C9*3 | CYP2C19*2 | CYP2C19*3 | CYP2C19*17   | CYP2D6*3     | CYP2D6*4 | CYP2D6*6 | CYP2D6*9 | CYP3A4*22    | CYP3A5*3 | VKORC1-<br>rs9923231 |
|-------------|---------------------|---------------------|-----------------------|------------------------|---------------------|--------------|----------|----------|-----------|-----------|--------------|--------------|----------|----------|----------|--------------|----------|----------------------|
| P1          | WT                  | WT                  | <b>varHm</b>          | WT                     | WT                  | <b>varHm</b> | WT       | WT       | WT        | WT        | <b>varHz</b> | <b>varHz</b> | WT       | WT       | WT       | WT           | varHm    | <b>varHz</b>         |
| Haloperidol |                     |                     |                       |                        |                     |              |          |          |           |           |              |              |          |          |          |              |          |                      |
| Clozapine   |                     |                     |                       |                        |                     |              |          |          |           |           |              |              |          |          |          |              |          |                      |
| P2          | <b>varHz</b>        | <b>varHz</b>        | -                     | <b>varHz</b>           | WT                  | varHm        | WT       | WT       | varHz     | WT        | WT           | WT           | WT       | WT       | WT       | <b>varHz</b> | varHm    | WT                   |
| P3          | <b>varHm</b>        | <b>varHm</b>        | -                     | <b>varHm</b>           | WT                  | WT           | varHz    | WT       | WT        | WT        | WT           | -            | -        | -        | -        | WT           | varHm    | varHz                |
| Vincristine |                     |                     |                       |                        |                     |              |          |          |           |           |              |              |          |          |          |              |          |                      |

Results of the PCR-Multiplex analysis

|  |                                                                                |
|--|--------------------------------------------------------------------------------|
|  | Polymorphism on a gene not significantly involved in the drug pharmacokinetics |
|  | Polymorphism on a gene moderately involved in the drug pharmacokinetics        |
|  | Polymorphism on a gene strongly involved in the drug pharmacokinetics          |

P1, P2, P3: patient ID

WT: wild-type allele; varHz: heterozygous for the variant allele; varHm: homozygous for the variant allele

(-): no amplification because of full gene deletion

**Table S3. Design of primers used in the assay**

| Gene and variant         | Primer ID         | Primer sequences (5'-3')                                     | amplicon size (pb) | Primer final concentration in the mix (pmol/μL) |
|--------------------------|-------------------|--------------------------------------------------------------|--------------------|-------------------------------------------------|
| CYP1A2*1F<br>rs762551    | F-CYP1A2*1F - WT  | <u>GTAAAACGACGGCCAGT</u> CAAAGGG<br>TGAGCTCTGTGGTCC          | 160                | 0.02                                            |
|                          | F-CYP1A2*1F - var | <u>GTTTCCCAGTCACGAC</u> CAAAGGG<br>TGAGCTCTGTGGACA           |                    | 0.02                                            |
|                          | R-CYP1A2*1F       | <u>GTTTCTT</u> TGGAGACATTCATTCATTC<br>ATTCC                  |                    | 0.3                                             |
| CYP2C9*2<br>rs1799853    | F-CYP2C9*2-WT     | <u>GTAAAACGACGGCCAGT</u> GGGAAGA<br>GGAGCATTGAGCAC           | 127                | 0.02                                            |
|                          | F-CYP2C9*2-var    | <u>GTTTCCCAGTCACGAC</u> GGGAAGA<br>GGAGCATTGAGCACT           |                    | 0.01                                            |
|                          | R-CYP2C9*2        | <u>GTTTCTT</u> AGGTCAGTGATATGGAGT<br>AGGGT                   |                    | 0.2                                             |
| CYP2C9*3<br>rs1057910    | F-CYP2C9*3-WT     | <u>GTAAAACGACGGCCAGT</u> GTGCACG<br>AGGTCCAGAGAAACA          | 328                | 0.03                                            |
|                          | F-CYP2C9*3-var    | <u>GTTTCCCAGTCACGAC</u> GTGCACGA<br>GGTCCAGAGAAACC           |                    | 0.01                                            |
|                          | R-CYP2C9*3        | <u>GTTTCTT</u> TAAATCTGGAGAACACAC<br>ACTGCC                  |                    | 0.4                                             |
| CYP2C19*2<br>rs4244285   | F-CYP2C19*2-WT    | <u>GTAAAACGACGGCCAGT</u> TTCCCACT<br>ATCATTGATTATTTGCCG      | 164                | 0.01                                            |
|                          | F-CYP2C19*2-var   | <u>GTTTCCCAGTCACGAC</u> TTCCCACT<br>ATCATTGATTATTTGCCA       |                    | 0.01                                            |
|                          | R-CYP2C19*2       | <u>GTTTCTT</u> ATCAATAAAGTCCCGAGG<br>GTTGT                   |                    | 0.4                                             |
| CYP2C19*3<br>rs4986893   | F-CYP2C19*3-WT    | <u>GTAAAACGACGGCCAGT</u> GGATTGT<br>AAGCACCCCGTG             | 183                | 0.01                                            |
|                          | F-CYP2C19*3-var   | <u>GTTTCCCAGTCACGAC</u> GGATTGTA<br>AGCACCCCGTGA             |                    | 0.005                                           |
|                          | R-CYP2C19*3       | <u>GTTTCTT</u> TACCCCATGGCTGTCTAG<br>G                       |                    | 0.2                                             |
| CYP2C19*17<br>rs12248560 | F-CYP2C19*17-WT   | <u>GTAAAACGACGGCCAGT</u> GGCGCAT<br>TATCTTTACATCAGACATG      | 202                | 0.04                                            |
|                          | F-CYP2C19*17-var  | <u>GTTTCCCAGTCACGAC</u> GGCGCAT<br>ATCTCTTACATCAGACATA       |                    | 0.01                                            |
|                          | R-CYP2C19*17      | <u>GTTTCTT</u> GTGGTTCTATTTAATGTGA<br>AGCCTGTTTATG           |                    | 0.8                                             |
| CYP2D6*3<br>rs35742686   | F-CYP2D6*3-WT     | <u>GTAAAACGACGGCCAGT</u> GATGAGC<br>TGCTAACTGAGGACA          | 478                | 0.02                                            |
|                          | F-CYP2D6*3-var    | <u>GTTTCCCAGTCACGAC</u> GATGAGCT<br>GCTAACTGAGGACG           |                    | 0.005                                           |
|                          | R-CYP2D6*3        | <u>GTTTCTT</u> CGGCCCTGCACTGTTTC<br>GTAAAACGACGGCCAGTCCGCATC |                    | 0.2                                             |
| CYP2D6*4<br>rs3892097    | F-CYP2D6*4-WT     | <u>GTAAAACGACGGCCAGT</u> CCGCATC<br>TCCACCCTCA               | 450                | 0.02                                            |
|                          | F-CYP2D6*4-var    | <u>GTTTCCCAGTCACGAC</u> CCGCATCT<br>CCACCCTCAA               |                    | 0.01                                            |
|                          | R-CYP2D6*4        | <u>GTTTCTT</u> TCTCTGACGTGGATAGGA<br>GGTACA                  |                    | 1.6                                             |
| CYP2D6*6<br>rs5030655    | F-CYP2D6*6-WT     | <u>GTAAAACGACGGCCAGT</u> CCTCCTCG<br>GTCAGCCA                | 227                | 0.04                                            |
|                          | F-CYP2D6*6-var    | <u>GTTTCCCAGTCACGAC</u> CCCTCCTCG<br>GTCAGCCC                |                    | 0.01                                            |
|                          | R-CYP2D6*6        | <u>GTTTCTT</u> CCAGGGGGAGCATAGGGT<br>T                       |                    | 2                                               |
| CYP2D6*9<br>rs5030656    | F-CYP2D6*9-WT     | <u>GTAAAACGACGGCCAGT</u> CTTCCTGG<br>CAGAGATGGACAAAG         | 410                | 0.02                                            |
|                          | F-CYP2D6*9-var    | <u>GTTTCCCAGTCACGAC</u> CTTCCTG<br>GCAGAGATCGAG              |                    | 0.01                                            |
|                          | R-CYP2D6*9        | <u>GTTTCTT</u> CGGCCCTGCACTGTTTC                             |                    | 1.6                                             |



|                         |                             |                                                                  |         |       |
|-------------------------|-----------------------------|------------------------------------------------------------------|---------|-------|
| CYP3A4*22<br>rs35599367 | F-CYP3A4*22-WT              | <u><b>GTAAAACGACGGCCAGT</b></u> AGTGTCT<br>CCATCACACCGAGC        | 118     | 0.02  |
|                         | F-CYP3A4*22-var             | <u><b>GTTTTCCCAGTCACGAC</b></u> AGTGTCTC<br>CATCACACCGAGT        |         | 0.01  |
|                         | R-CYP3A4*22                 | <u><b>GTTTCTT</b></u> GATCTACTAGATCACCTTC<br>TATCACACTCCA        |         | 0.4   |
| CYP3A5*3<br>rs776746    | F-CYP3A5-WT                 | <u><b>GTAAAACGACGGCCAGT</b></u> TGTGGTC<br>CAAACAGGGAAGAGTTAT    | 305     | 0.02  |
|                         | F-CYP3A5-var                | <u><b>GTTTTCCCAGTCACGAC</b></u> TGTGGTCC<br>AAACAGGGAAGAGTTAC    |         | 0.01  |
|                         | R-CYP3A5                    | <u><b>GTTTCTT</b></u> AGATGACACAGCTCTAGA<br>TGTCC                |         | 0.8   |
| VKORC1-<br>rs9923231    | F-VKORC1-<br>rs9923231-WT   | <u><b>GTAAAACGACGGCCAGT</b></u> GACCTGA<br>AAAACAACCATTTGGACG    | 397     | 0.01  |
|                         | F-VKORC1-<br>rs9923231-var  | <u><b>GTTTTCCCAGTCACGAC</b></u> GACCTGAA<br>AAACAACCATTTGGACA    |         | 0.04  |
|                         | R-VKORC1-<br>rs9923231      | <u><b>GTTTCTT</b></u> CCTGACACCTAGTGGCTG<br>GT                   |         | 1.6   |
| ABCB1-<br>rs1045642     | F-ABCB1-<br>rs1045642-var   | <u><b>GTAAAACGACGGCCAGT</b></u> CTCCTTTG<br>CTGCCCTGACA          | 319     | 0.02  |
|                         | F-ABCB1-<br>rs1045642-WT    | <u><b>GTTTTCCCAGTCACGAC</b></u> CTCCTTTG<br>CTGCCCTGACG          |         | 0.005 |
|                         | R-ABCB1-<br>rs1045642       | <u><b>GTTTCTT</b></u> TACACAAACTTTTCCTTA<br>ATCTCA               |         | 0.8   |
| ABCB1-<br>rs1128503     | F-ABCB1-<br>rs1128503-var   | <u><b>GTAAAACGACGGCCAGT</b></u> ACTCTGC<br>ACCTTCAGGTTGAGA       | 338     | 0.02  |
|                         | F-ABCB1-<br>rs1128503-WT    | <u><b>GTTTTCCCAGTCACGAC</b></u> ACTCTGCA<br>CCTTCAGGTTGAGG       |         | 0.005 |
|                         | R-ABCB1-<br>rs1128503       | <u><b>GTTTCTT</b></u> AGCCAAGTATTGACAGCT<br>ATTCG                |         | 0.6   |
| ABCB1-<br>rs2032582     | F-ABCB1-<br>rs2032582-var-T | <u><b>GTAAAACGACGGCCAGT</b></u> ATTTAGTT<br>TGACTCACCTTCCGAGA    | 424     | 0.02  |
|                         | F-ABCB1-<br>rs2032582-WT-G  | GTTTTCCCAGTCACGACATTTAGTTT<br>GACTCACCTTCCGAGC                   |         | 0.005 |
|                         | F-ABCB1-<br>rs2032582-var-A | <u><b>GTTTTCCCAGTCACGAC</b></u> CATATTTA<br>GTTTGACTCACCTTCCCTGT | 427     | 0.005 |
|                         | R-ABCB1-<br>rs2032582       | <u><b>GTTTCTT</b></u> CTGAAGTCATGGAAATTCT<br>TACTGT              | 424/427 | 0.8   |
| ABCB1-<br>rs2229109     | F-ABCB1-<br>rs2229109-WT    | <u><b>GTAAAACGACGGCCAGT</b></u> CCTTAACT<br>TCTTTTCGAGATGGGAAAC  | 360     | 0.02  |
|                         | F-ABCB1-<br>rs2229109-var   | <u><b>GTTTTCCCAGTCACGAC</b></u> CCTTAACT<br>TCTTTTCGAGATGGGAAAT  |         | 0.01  |
|                         | R-ABCB1-<br>rs2229109       | <u><b>GTTTCTT</b></u> GGACAGGCATCTCCAAGC<br>AT                   |         | 0.4   |

F: forward; R: reverse; WT: wild type; var: variant

**GTAAAACGACGGCCAGT**: M13 sequence (-20) added to 5' flanking forward primers

**GTTTTCCCAGTCACGAC**: M13 sequence (-40) added to the 5' flanking forward primers

**GTTTCTT**: "Pigtail" added to 5' flanking reverse primers

**X**: mismatch nucleotide in bold

**X**: position of the polymorphism

For the design of primers, the term "variant" was assigned to the lowest frequent allele compared to wild type in the total human population and according to the database dbSNP

<https://www.ncbi.nlm.nih.gov/snp/>
